# Supplementary material
Source: Springer Nature journal article supplement (https://www.springermedizin.de/resource/supplementary/12885_2013_4487_MOESM6_ESM.pdf/9466474)
Supplement: MOESM6 [file 9466474]

| De-ID Patient # | Percent ER+ |       | Stain Intensity | Allred Score | Histological Score | # of vessels per unit area (um2) | Maximum Vessel Area (um2) | Mean Vessel Area (um2) | Mean Vessel Perimeter (um) | Mean Lumen Area (um2) | Necrotic Area per Tumor Area |
|-----------------|-------------|-------|-----------------|--------------|--------------------|----------------------------------|---------------------------|------------------------|----------------------------|-----------------------|------------------------------|
|                 | ER+ or ER-  | cells |                 |              |                    |                                  |                           |                        |                            |                       |                              |
| Patient 1       | -           | 0     | 0               | 0            | 0                  | 2.12E-04                         | 1301                      | 197.3                  | 91.5                       | 47.5                  | 23.1                         |
| Patient 2       | -           | 0     | 0               | 0            | 0                  | 7.97E-05                         | 153                       | 63.1                   | 41.4                       | 7.7                   | 69.3                         |
| Patient 3       | -           | 0     | 0               | 0            | 0                  | 3.67E-04                         | 2127                      | 224.4                  | 107.4                      | 21.2                  | <.5                          |
| Patient 4       | -           | 0     | 0               | 0            | 0                  | 5.19E-05                         | 329                       | 102.8                  | 58.2                       | 8.2                   | 16.2                         |
| Patient 5       | -           | 0     | 0               | 0            | 0                  | 1.14E-03                         | 12195                     | 287.9                  | 141.5                      | 34.4                  | 22.4                         |
| Patient 6       | -           | 0     | 0               | 0            | 0                  | 1.56E-03                         | 8609                      | 178.0                  | 82.9                       | 28.9                  | 14.9                         |
| Patient 7       | +           | 90    | 1+ to 3+        | 6            | 150                | 6.19E-04                         | 13082                     | 482.8                  | 195.7                      | 72.3                  | 33.7                         |
| Patient 8       | +           | 95    | 1+ to 3+        | 7            | 155                | 4.35E-04                         | 4560                      | 307.4                  | 142.1                      | 44.6                  | 1.1                          |
| Patient 9       | +           | 95    | 1+ to 3+        | 7            | 165                | 8.38E-04                         | 12672                     | 282.1                  | 122.8                      | 40.4                  | <.5                          |
| Patient 10      | +           | 90    | 2+              | 7            | 170                | 7.23E-04                         | 14879                     | 347.7                  | 153.3                      | 34.8                  | 22.1                         |
| Patient 11      | +           | 100   | 1+ to 3+        | 8            | 200                | 4.79E-05                         | 1784                      | 368.6                  | 138.2                      | 33.3                  | 4.7                          |
| Patient 12      | +           | 95    | 1+ to 3+        | 7            | 240                | 5.39E-04                         | 6274                      | 267.6                  | 107.4                      | 61.5                  | <.5                          |
| Patient 13      | +           | 100   | 2+ to 3+        | 8            | 260                | 5.59E-05                         | 7927                      | 671.4                  | 258.4                      | 16.5                  | 5.2                          |
| Patient 14      | +           | 90    | 3+              | 8            | 270                | 9.18E-04                         | 19704                     | 465.8                  | 191.7                      | 23.2                  | 2.5                          |
| Patient 15      | +           | 90    | 3+              | 8            | 270                | 7.66E-04                         | 16094                     | 341.9                  | 130.9                      | 21.7                  | <.5                          |
| Patient 16      | +           | 100   | 2+ to 3+        | 8            | 270                | 4.67E-04                         | 1712                      | 178.8                  | 98.7                       | 40.4                  | 1.6                          |
| Patient 17      | +           | 100   | 2+ to 3+        | 8            | 270                | 7.27E-04                         | 19485                     | 436.3                  | 174.1                      | 29.3                  | <.5                          |
| Patient 18      | +           | 100   | 2+ to 3+        | 8            | 280                | 8.26E-04                         | 4379                      | 221.2                  | 110.9                      | 65.8                  | <.5                          |
| Patient 19      | +           | 100   | 3+              | 8            | 300                | 2.35E-04                         | 1619                      | 172.4                  | 80.6                       | 30.9                  | 3.9                          |
| Patient 20      | +           | 100   | 3+              | 8            | 300                | 8.78E-05                         | 3673                      | 312.2                  | 152.3                      | 17.6                  | <.5                          |
| Patient 21      | +           | 100   | 3+              | 8            | 300                | 5.03E-04                         | 8258                      | 271.8                  | 115.1                      | 47.7                  | <.5                          |
| Patient 22      | +           | 100   | 3+              | 8            | 300                | 4.87E-04                         | 17390                     | 373.7                  | 158.7                      | 52.3                  | <.5                          |
| Patient 23      | +           | 100   | 3+              | 8            | 300                | 7.74E-04                         | 14857                     | 512.3                  | 234.2                      | 58.8                  | <.5                          |
| Patient 24      | +           | 100   | 3+              | 8            | 300                | 7.03E-04                         | 11188                     | 438.0                  | 156.7                      | 40.9                  | <.5                          |
| Neg control     | NA          | NA    | NA              | NA           | NA                 | 1.72E-04                         | 2207                      | 116.1                  | 59.3                       | 6.3                   | NA                           |
| Pos control     | NA          | NA    | NA              | NA           | NA                 | 9.78E-04                         | 11836                     | 345.8                  | 156.3                      | 22.4                  | NA                           |

**Table 2. Quantification metrics for all patients**
